# Supplementary material for: Novel synthesis of RGO/NiCoAl–LDH nanosheets on nickel foam for supercapacitors with high capacitance
Source: Royal Society of Chemistry journal article supplement (doi:10.1039/c6ra23863g), 2016-01-01
Supplement: c6ra23863g1.pdf [file c6ra23863g1.pdf]

Electronic Supplementary Material (ESI) for RSC Advances.  
This journal is © The Royal Society of Chemistry 2016

## Electronic Supplementary Information

### **Novel synthesis of RGO/NiCoAl-LDH nanosheets on nickel foam for supercapacitor with high capacitance**

Weifang Su,<sup>a,b</sup> Tao Lin,<sup>\*a</sup> Wei Chu,<sup>\*b,c</sup> Yachao Zhu,<sup>b,c</sup> Jing Li,<sup>b</sup> and Xiusong Zhao<sup>d</sup>

*a* Key Laboratory of Green Chemistry and Technology of Ministry of Education (MOE),  
College of Chemistry, Sichuan University, Chengdu 610064, PR China. E-mail:  
[lintaochem@scu.edu.cn](mailto:lintaochem@scu.edu.cn)

*b* Department of Chemical Engineering, Institute of New Energy and Low-carbon  
Technology, School of Chemical Engineering, Sichuan University, Chengdu 610065,  
China. E-mail: [chuwei1965@scu.edu.cn](mailto:chuwei1965@scu.edu.cn)

*c* Sichuan Provincial Engineering Technology Center for Environmental Protection  
Catalytic Materials, Chengdu 610064, China

*d* Department of Chemical Engineering, University of Queensland, Brisbane 4067,  
Australia. E-mail: [george.zhao@uq.edu.au](mailto:george.zhao@uq.edu.au)

---

\* Corresponding author. Tel: +86 028 85403836  
Email address: [chuwei1965@foxmail.com](mailto:chuwei1965@foxmail.com)

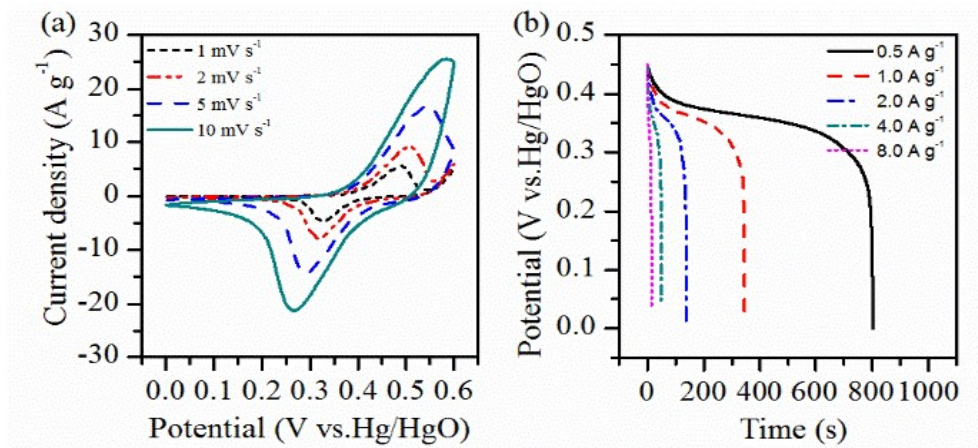

**Figure S1.** (a) CV curves of the RGL-2 nanosheets at various scan rates; (b) Galvanostatic charge-discharge curves of RGL-2 electrode measured at various current densities

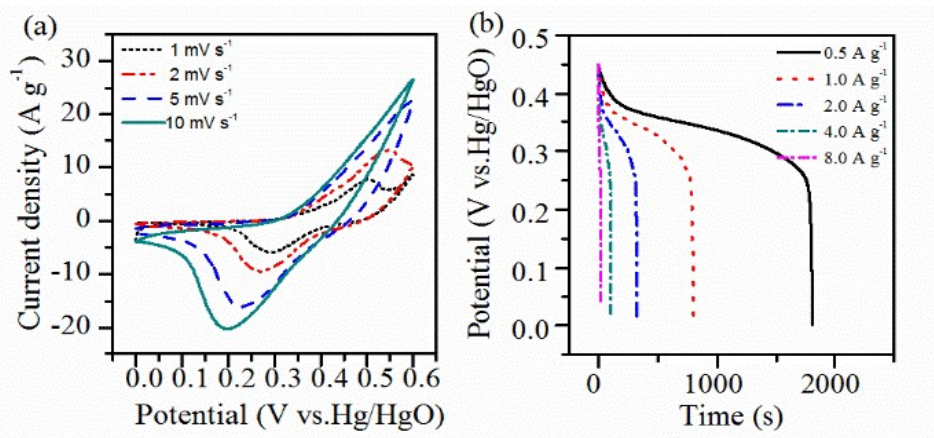

**Figure S2.** (a) CV curves of the RGL-1@NF nanosheets at various scan rates; (b) Galvanostatic charge-discharge curves of RGL-1@NF electrode measured at various current densities.

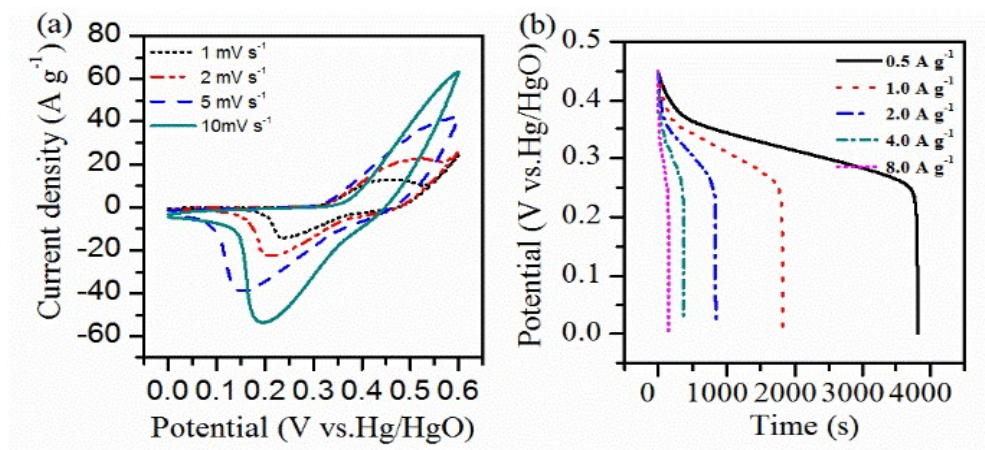

**Figure S3.** (a) CV curves of the RGL-3@NF nanosheets at various scan rates; (b) Galvanostatic charge-discharge curves of RGL-3@NF electrode measured at various current densities

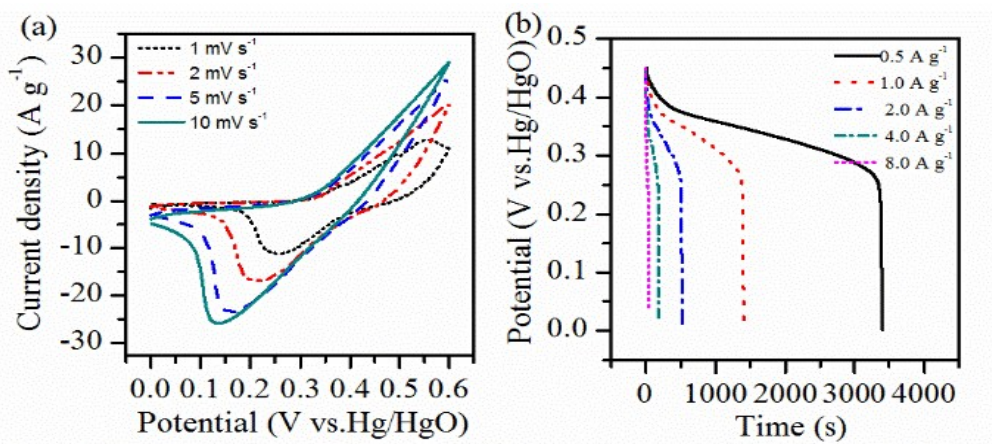

**Figure S4.** (a) CV curves of the RGL-4@NF nanosheets at various scan rates; (b) Galvanostatic charge-discharge curves of RGL-4@NF electrode measured at various current densities.

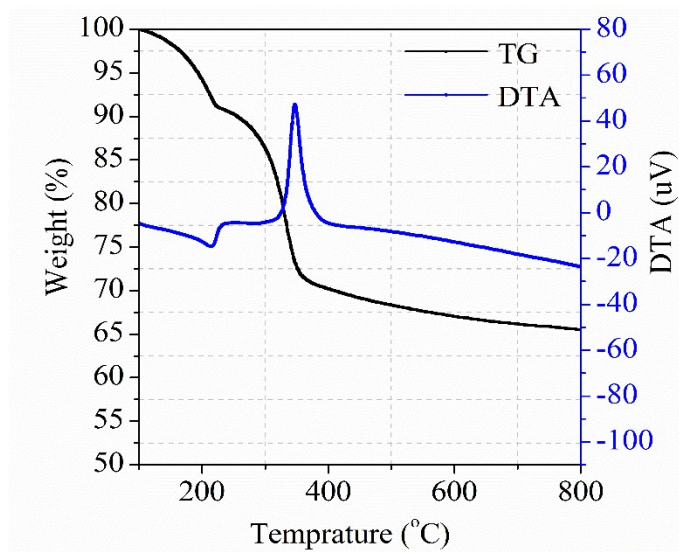

**Figure S5.** TG and DTA profiles of RGL-2 composite.

**Table S1.** Specific capacitance of the electrode materials at different current density

| Sample   | Specific capacitance (F g <sup>-1</sup> ) |                     |                     |                     |                     |
|----------|-------------------------------------------|---------------------|---------------------|---------------------|---------------------|
|          | 0.5 A g <sup>-1</sup>                     | 1 A g <sup>-1</sup> | 2 A g <sup>-1</sup> | 4 A g <sup>-1</sup> | 8 A g <sup>-1</sup> |
| RGL-2    | 893.2                                     | 773.3               | 612.4               | 437.3               | 244                 |
| RGL-2@NF | 4849                                      | 4732                | 4462                | 4068                | 3262                |

**Table S2** Specific capacitance of the RGL-2 and the residual precipitate RGL-2/NF at different current density

| Sample   | 0.5 A g <sup>-1</sup> | 1 A g <sup>-1</sup> | 2 A g <sup>-1</sup> | 4 A g <sup>-1</sup> | 8 A g <sup>-1</sup> |
|----------|-----------------------|---------------------|---------------------|---------------------|---------------------|
| RGL-2/NF | 1301                  | 1263.2              | 1253.6              | 1160                | 1000                |
| RGL-2@NF | 4849.7                | 4732.6              | 4462.8              | 4068.4              | 3262.2              |
